# Supplementary material for: Recyclable 3D graphene aerogel with bimodal pore structure for ultrafast and selective oil sorption from water
Source: Royal Society of Chemistry journal article supplement (doi:10.1039/c7ra02886e), 2017-01-01
Supplement: c7ra02886e1.pdf [file c7ra02886e1.pdf]

## Supplementary information

# Recyclable 3D Graphene Aerogel with Bimodal Pore Structure for Ultrafast and Selective Oils Sorption from Water

Muhammad Adil Riaz<sup>†</sup>, Pejman Hadi<sup>‡</sup>, Irfan H. Abidi<sup>†</sup>, Abhishek Tyagi<sup>†</sup>, Xuewu Ou<sup>†</sup> and

Zhengtang Luo<sup>†,\*</sup>

<sup>†</sup> *Department of Chemical and Biomolecular Engineering, Hong Kong University of Science and  
Technology, Clear Water Bay, Kowloon, Hong Kong*

<sup>‡</sup> *New York Center for Clean Water Technology, Stony Brook University, NY 11794, USA*

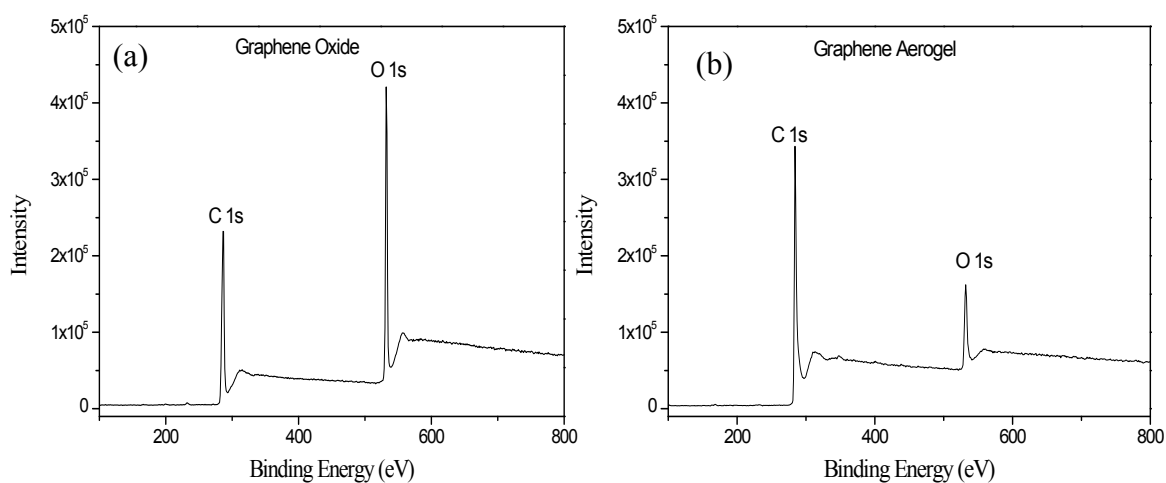

**Figure S1.** Full range XPS spectra for graphene oxide and graphene aerogel.

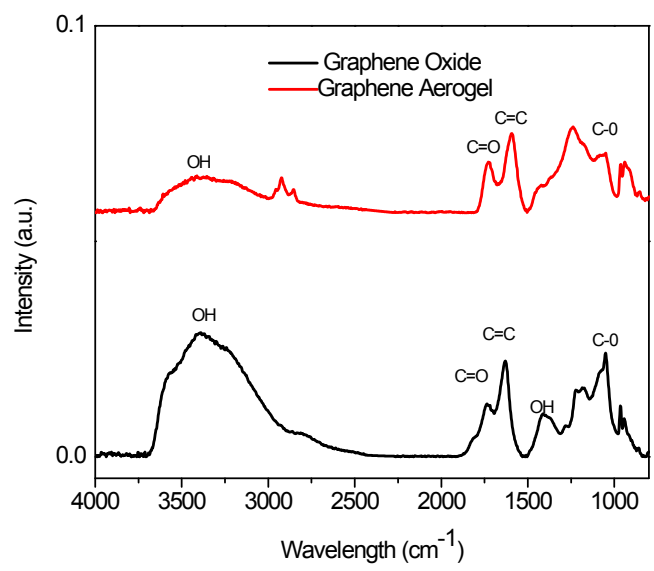

**Figure S2.** FTIR spectra for graphene oxide and graphene aerogel.

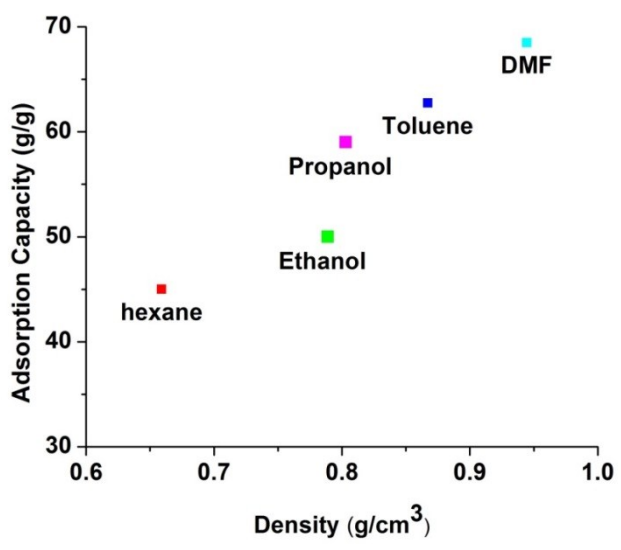

**Figure S3.** Effect of density on sorption capacity for organic solvents.

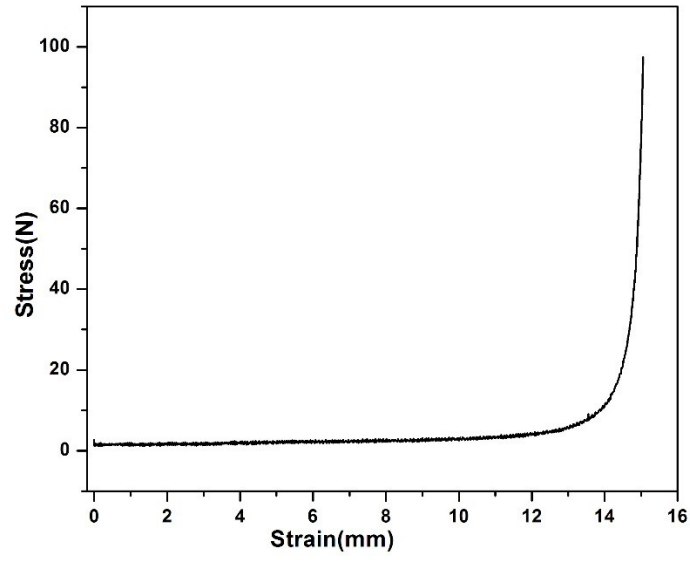

**Figure S4.** Stress strain curve of 3D graphene aerogel

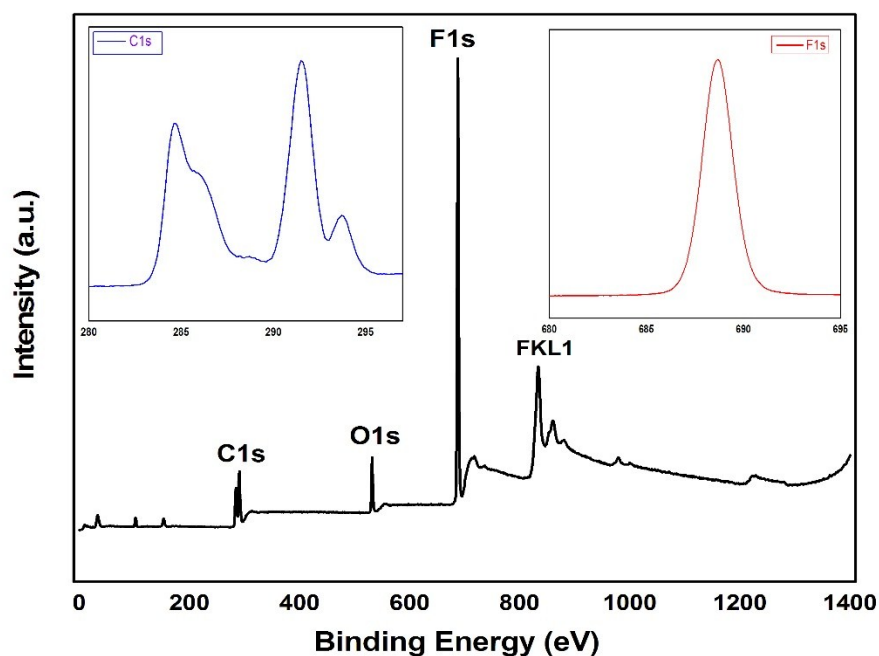

**Figure S5.** Full range XPS spectra of silane functionalized GA (insets show the C1s and F1s)

**Table S1** Comparative study of sorption capacity of graphene aerogel with other common sorbents

| Sorbent          | Oils                                     | Capacity<br>g/g            | Organic liquid                                                    | Capacity<br>g/g | Ref.      |
|------------------|------------------------------------------|----------------------------|-------------------------------------------------------------------|-----------------|-----------|
| Graphene aerogel | Mineral vegetable motor oil, oil         | oil, 60-70<br>oil,<br>gear | All organic liquids                                               | 40-70           | This work |
| Activated carbon | --                                       | --                         | Benzene , toluene                                                 | <1              | 1         |
| PDMS Sponge      | Silicone oil, motor oil, transformer oil | 4.5                        | Chloroform, dichloromethane, N-N DMF, methanol, toluene, ethanol, | 4-11            | 2         |

---

|                                |                                            |            |         |                        |       |    |
|--------------------------------|--------------------------------------------|------------|---------|------------------------|-------|----|
|                                |                                            |            |         | acetone                |       |    |
| Polyurethane sponge            | Lubricating oil, dodecane                  | oil, 19,13 | 19,13   | Octane, decane         | 14    | 3  |
| Polypropylene                  | Diesel oil, crude oil, olive oil, fuel oil |            | 9-16    | Toluene                | 11.4  | 4  |
| CNT Sponge                     | Mineral,oil vegetable diesel oil           | oil,       | 100-125 | Octane , ethyl acetate | 50    | 5  |
| Silica Aerogel                 | Diesel oil                                 |            | 19      | All organic liquids    | 9-21  | 6  |
| Boron Nitride Sheets           | Motor oil                                  |            | 20      |                        | 5-14  |    |
| Fe/C, Co/C, Ni/C nanoparticles | Lube oil, crude oil , bean oil , dodecane  |            | 4.8-7.5 | Decane                 | 4.5   | 7  |
| Nanocellulose aerogel          | Dodecane, paraffin mineral oil             | oil        | 25-30   | All organic liquids    | 20-40 | 8  |
| Natural Wool                   | Diesel oil, crude oil                      |            | 12.5    | --                     | --    | 9  |
| Cotton Fiber                   | Vegetable oil, mineral oil, fuel oil       |            | 17-20   | Petroleum liquids      | 20    | 10 |

---

**Table S2**

| Oil Type      | Pseudo 1st Order |                |                | Pseudo 2nd Order |                |                | Intraparticle Diffusion |        |                |
|---------------|------------------|----------------|----------------|------------------|----------------|----------------|-------------------------|--------|----------------|
|               | Q <sub>e</sub>   | K <sub>1</sub> | R <sup>2</sup> | Q <sub>e</sub>   | K <sub>2</sub> | R <sup>2</sup> | K <sub>i</sub>          | C      | R <sup>2</sup> |
| Mineral Oil   | 33.845           | 0.068          | 0.7829         | 66.622           | 0.005          | 0.9945         | 4.898                   | 25.992 | 0.4664         |
| Vegetable Oil | 35.815           | 0.042          | 0.5735         | 71.327           | 0.007          | 0.9976         | 5.269                   | 24.224 | 0.4854         |

**Table S3** Comparative study of graphene aerogel with previously reported 3D graphene sorbents for oils & organics

|                               | Chemicals                       | Synthesis Method                                                     | Performance                                                                           | Recycling                           | Physical Properties                                       | Ref. |
|-------------------------------|---------------------------------|----------------------------------------------------------------------|---------------------------------------------------------------------------------------|-------------------------------------|-----------------------------------------------------------|------|
| <b>Spongy Graphene</b>        | GO, Ammonia                     | Hydrothermal 180 °C, 24 hr, Freeze drying                            | Capacity 20-86 g/g, no quantitative kinetic study (oil drop on water adsorbed in 80s) | 10 cycles by heating                | (Surface area, contact angle) 432m <sup>2</sup> /g, 114 ° | 11   |
| <b>Spongy Graphene</b>        | GO only                         | Freeze casting, high temperature (1000°C) reduction & soot treatment | Capacity 120-616 g/g, no kinetic study                                                | Burning & Heating                   | 155°                                                      | 12   |
| <b>Graphene Sponge</b>        | GO, Thiourea                    | Hydrothermal 180 °C, 4.5 hr, Freeze drying                           | Capacity 80-154 g/g, no quantitative kinetic study (diesel oil drop adsorbed in 10s)  | Burning                             | 399 m <sup>2</sup> /g                                     | 13   |
| <b>Graphene oxide Aerogel</b> | GO, Thiourea                    | Thermal Polycondensation, freeze casting                             | Capacity 50-90 g/g, no kinetic study                                                  | --                                  | 385 m <sup>2</sup> /g                                     | 14   |
| <b>Graphene Foam</b>          | GO, EDA, Copolymer (PV2P-b-PHA) | Chemical Reduction, Freeze drying                                    | 40-196 g/g, 2ml toluene adsorbed in 21s                                               | Ph induced desorption for 10 cycles | 152° (Ph=7)                                               | 15   |
| <b>Macroscopic</b>            | GO, Iron oxide Nanoparticles    | Chemical Reduction                                                   | 10-27g/g, no kinetic study                                                            | Burning for 6 cycles                | --                                                        | 16   |

## graphene

|                         |         |                                                               |                                                                                                                                                                               |                                                                   |                           |                  |
|-------------------------|---------|---------------------------------------------------------------|-------------------------------------------------------------------------------------------------------------------------------------------------------------------------------|-------------------------------------------------------------------|---------------------------|------------------|
| <b>Graphene Aerogel</b> | GO Only | Hydrothermal 180 °C, 2 hr, freeze drying, treatment<br>Silane | 40-70g/g oils/organics, Water sorption reduction from 20g/g to 5g/g , quantitative kinetic study for oils (uptake & desorption within 1min ) & organics (sorption within 4 s) | Solvent extraction (oils) & heating(org anics) for several cycles | 49m <sup>2</sup> /g, 130° | <b>This work</b> |
|-------------------------|---------|---------------------------------------------------------------|-------------------------------------------------------------------------------------------------------------------------------------------------------------------------------|-------------------------------------------------------------------|---------------------------|------------------|

## References:

- (1) Lillo-Ródenas, M. A.; Cazorla-Amorós, D.; Linares-Solano, A. Behaviour of Activated Carbons with Different Pore Size Distributions and Surface Oxygen Groups for Benzene and Toluene Adsorption at Low Concentrations. *Carbon N. Y.* **2005**, *43*, 1758–1767.
- (2) Choi, S.-J.; Kwon, T.-H.; Im, H.; Moon, D.-I.; Baek, D. J.; Seol, M.-L.; Duarte, J. P.; Choi, Y.-K. A Polydimethylsiloxane (PDMS) Sponge for the Selective Absorption of Oil from Water. *ACS Appl. Mater. Interfaces* **2011**, *3*, 4552–4556.
- (3) Zhu, Q.; Pan, Q.; Liu, F. Facile Removal and Collection of Oils from Water Surfaces through Superhydrophobic and Superoleophilic Sponges. *J. Phys. Chem. C* **2011**, *115*, 17464–17470.
- (4) Ceylan, D.; Dogu, S.; Karacik, B.; Yakan, S. D.; Okay, O. S.; Okay, O. Evaluation of Butyl Rubber as Sorbent Material for the Removal of Oil and Polycyclic Aromatic Hydrocarbons from Seawater. *Environ. Sci. Technol.* **2009**, *43*, 3846–3852.
- (5) Gui, X.; Li, H.; Wang, K.; Wei, J.; Jia, Y.; Li, Z.; Fan, L.; Cao, A.; Zhu, H.; Wu, D. Recyclable Carbon Nanotube Sponges for Oil Absorption. *Acta Mater.* **2011**, *59*, 4798–4804.
- (6) Rao, V.; Hegde, N. D.; Hirashima, H. Absorption and Desorption of Organic Liquids in Elastic Superhydrophobic Silica Aerogels. *J. Colloid Interface Sci.* **2007**, *305*, 124–132.
- (7) Chu, Y.; Pan, Q. Three-Dimensionally Macroporous Fe/C Nanocomposites as Highly Selective Oil-Absorption Materials. *ACS Appl. Mater. Interfaces* **2012**, *4*, 2420–2425.
- (8) Korhonen, J. T.; Kettunen, M.; Ras, R. H. a; Ikkala, O. Hydrophobic Nanocellulose Aerogels as Floating, Sustainable, Reusable, and Recyclable Oil Absorbents. *ACS Appl. Mater. Interfaces* **2011**, *3*, 1813–1816.
- (9) Radetić, M. M.; Jocić, D. M.; Jovančić, P. M.; Petrović, Z. L.; Thomas, H. F. Recycled

- Wool-Based Nonwoven Material as an Oil Sorbent. *Environ. Sci. Technol.* **2003**, *37*, 1008–1012.
- (10) Deschamps, G.; Caruel, H.; Borredon, M.-E.; Bonnin, C.; Vignoles, C. Oil Removal from Water by Selective Sorption on Hydrophobic Cotton Fibers. *Environ. Sci. Technol.* **2003**, *37*, 1013–1015.
  - (11) Bi, H.; Xie, X.; Yin, K.; Zhou, Y.; Wan, S.; He, L.; Xu, F.; Banhart, F.; Sun, L.; Ruoff, R. S. Spongy Graphene as a Highly Efficient and Recyclable Sorbent for Oils and Organic Solvents. *Adv. Funct. Mater.* **2012**, *22*, 4421–4425.
  - (12) Bi, H.; Xie, X.; Yin, K.; Zhou, Y.; Wan, S.; Ruoff, R. S.; Sun, L. Highly Enhanced Performance of Spongy Graphene as an Oil Sorbent. *J. Mater. Chem. A* **2014**, *2*, 1652–1656.
  - (13) Zhao, J.; Ren, W.; Cheng, H.-M. Graphene Sponge for Efficient and Repeatable Adsorption and Desorption of Water Contaminations. *J. Mater. Chem.* **2012**, *22*, 20197–20202.
  - (14) Wan, W. . b; Yu, S. . ; Dong, F. . ; Zhang, Q. . ; Zhou, Y. . b. Efficient C<sub>3</sub>N<sub>4</sub>/graphene Oxide Macroscopic Aerogel Visible-Light Photocatalyst. *J. Mater. Chem. A* **2016**, *4*, 7823–7829.
  - (15) Zhu, H.; Chen, D.; Li, N.; Xu, Q.; Li, H.; He, J.; Lu, J. Graphene Foam with Switchable Oil Wettability for Oil and Organic Solvents Recovery. *Adv. Funct. Mater.* **2015**, *25*, 597–605.
  - (16) Process, S.; Cong, H.; Ren, X.; Wang, P.; Yu, S. Macroscopic Multifunctional Graphene-Based Hydrogels and Aerogels by a Metal Ion Induced. **2012**, 2693–2703.
